# Supplementary material for: Preclinical and randomized clinical evaluation of the p38α kinase inhibitor neflamapimod for basal forebrain cholinergic degeneration
Source: PubMed Central journal article supplement (PMC9492778; doi:10.1038/s41467-022-32944-3), 2022-09-21
Supplement: 41467_2022_32944_MOESM1_ESM.pdf [file 41467_2022_32944_MOESM1_ESM.pdf]

# Supplementary Figure 1. Hallucinations Severity Over Time on Study

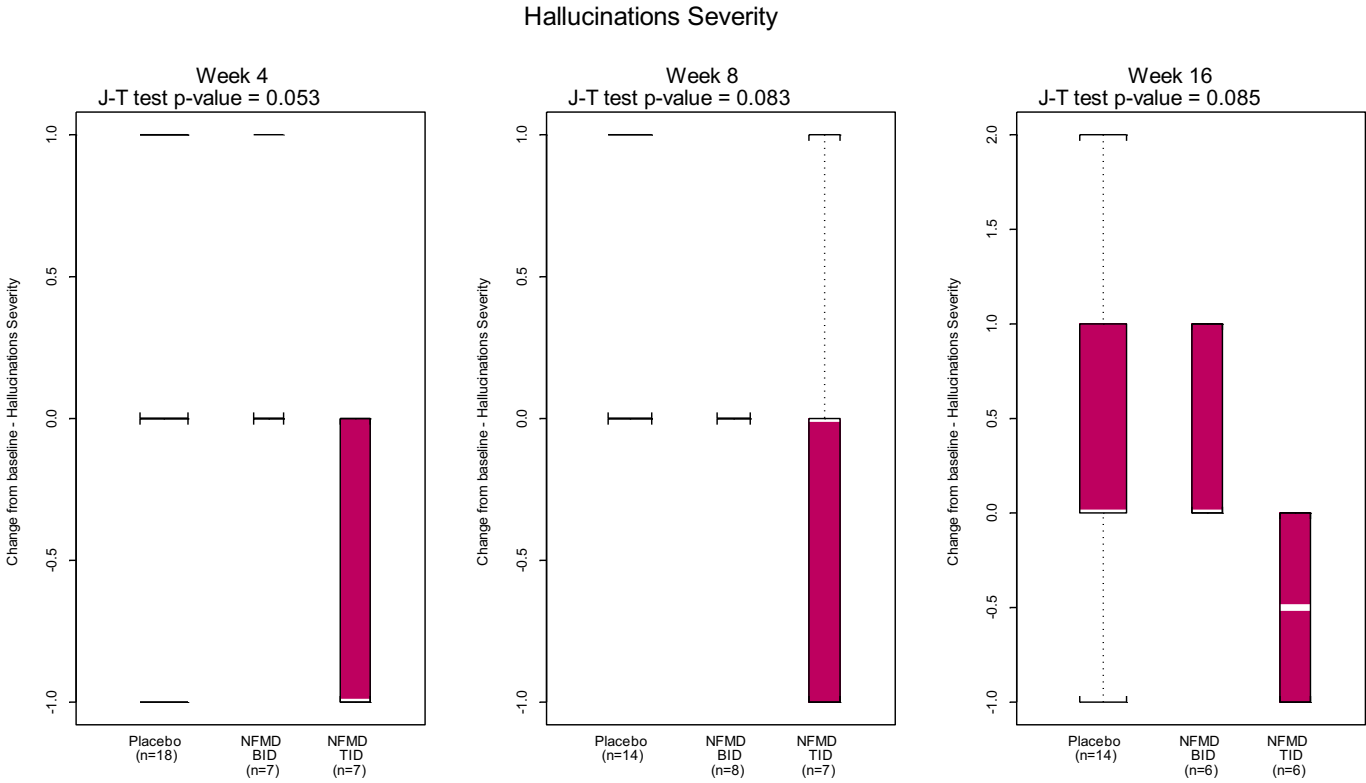

**Legend:**

Change from baseline [median, intra-quartile range in red, and range] is shown for each domain at each time point. A reduction in score reflects improvement. “J-T test” is the Jonckheere-Terpstra test for dose responses for greater reduction (improvement) in the order of placebo (lowest)<NFMD BID<NFMD TID (greatest amount of reduction).

## Supplementary Figure 2. 10-Item Neuropsychiatric Inventory Domains of Interest

Change from baseline [median, intra-quartile range in red, and range] is shown for each domain at each time point. A reduction in score reflects improvement. “J-T test” is the Jonckheere-Terpstra test for dose responses for greater reduction (improvement) in the order of placebo (lowest)<NFMD BID<NFMD TID (greatest amount of reduction). “FxS Score” = frequency times severity score (range 0-12).

### Hallucinations

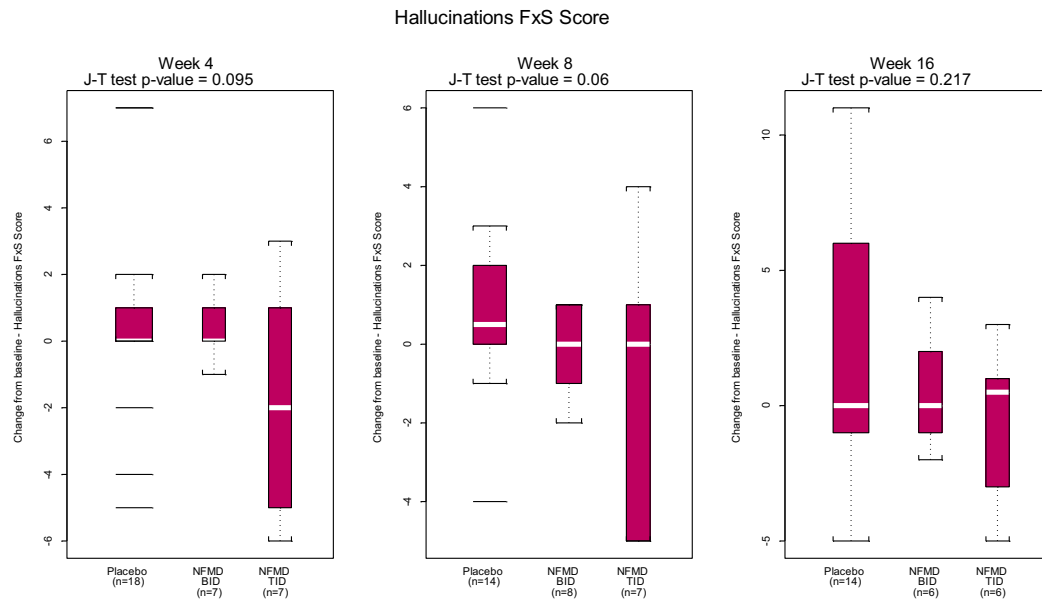

### Agitation/Aggression

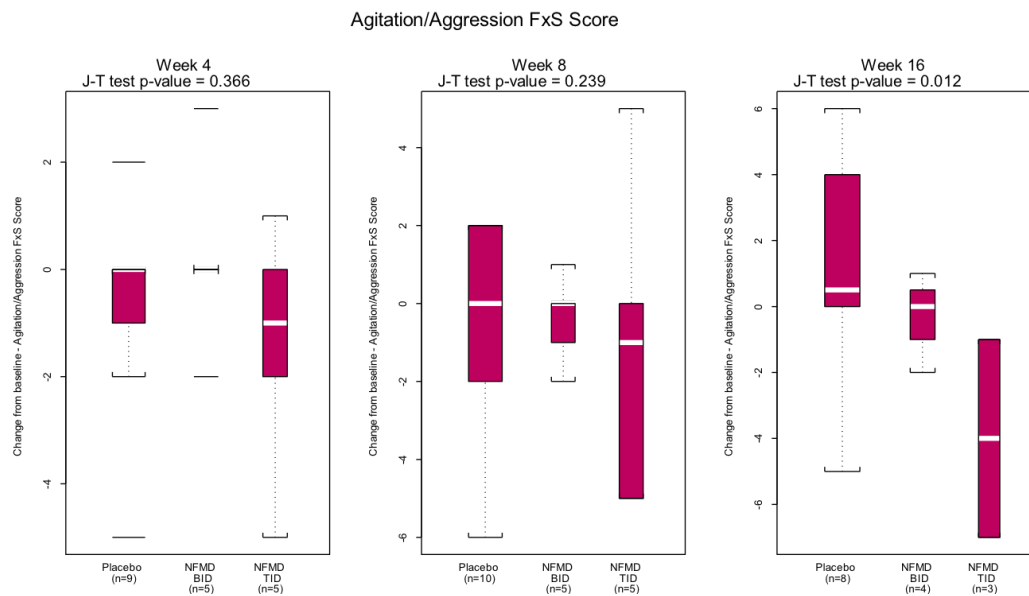

# Depression/Dysphoria

## Depression/Dysphoria FxS Score

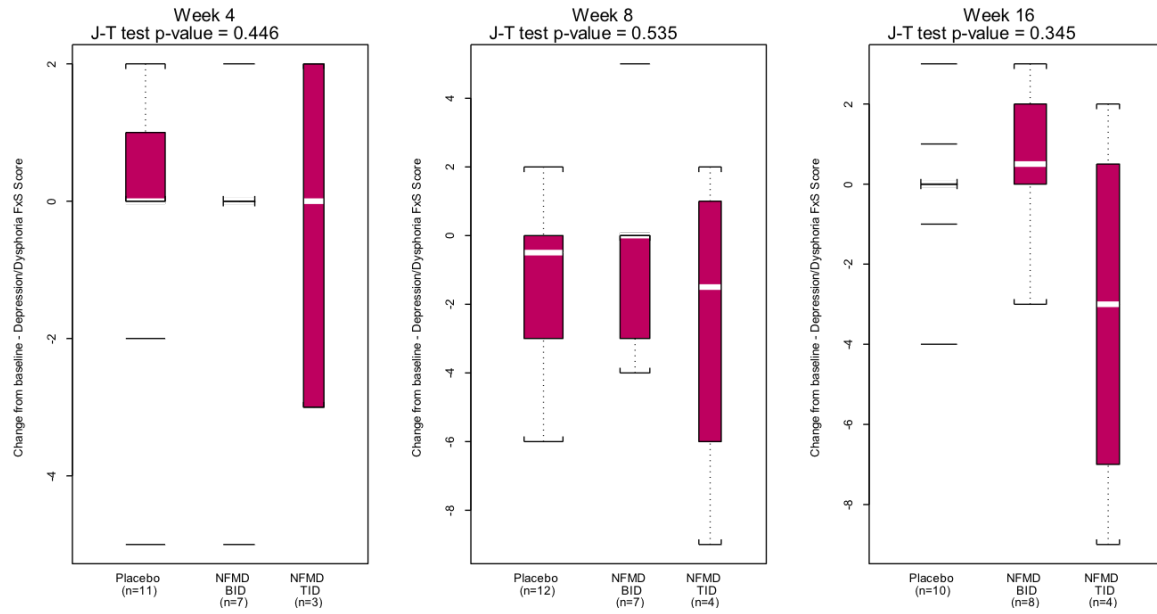

# Anxiety

## Anxiety FxS Score

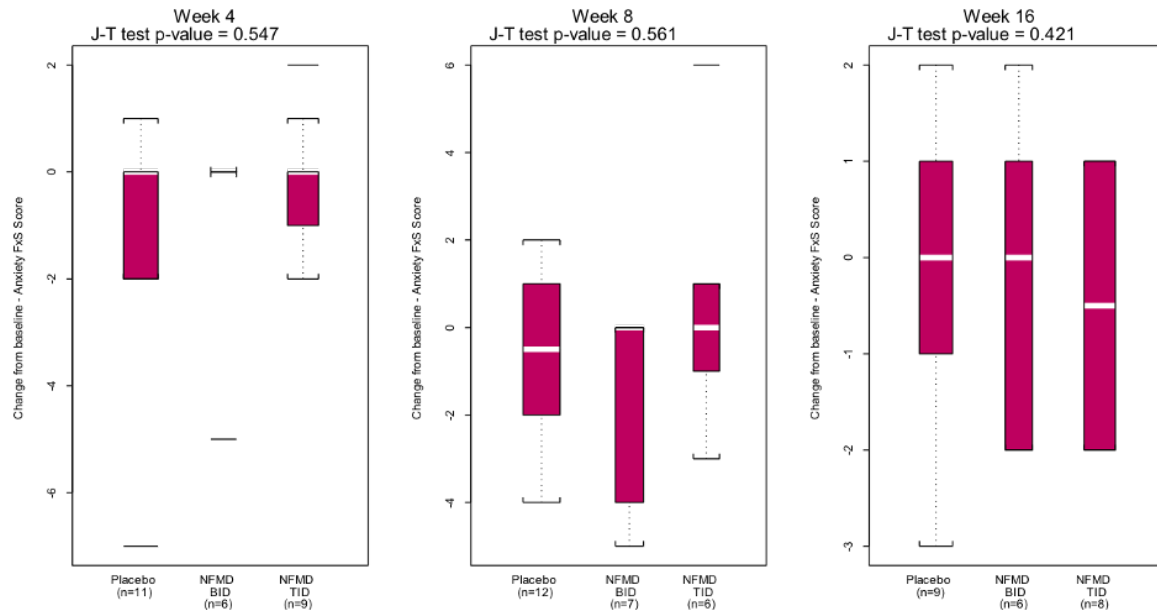

**Supplementary Figure 3. Descriptive analyses of observed cognitive testing data in clinical study**

**a. Neuropsychological Test Battery composite z-score**      **b. Attention composite z-score**

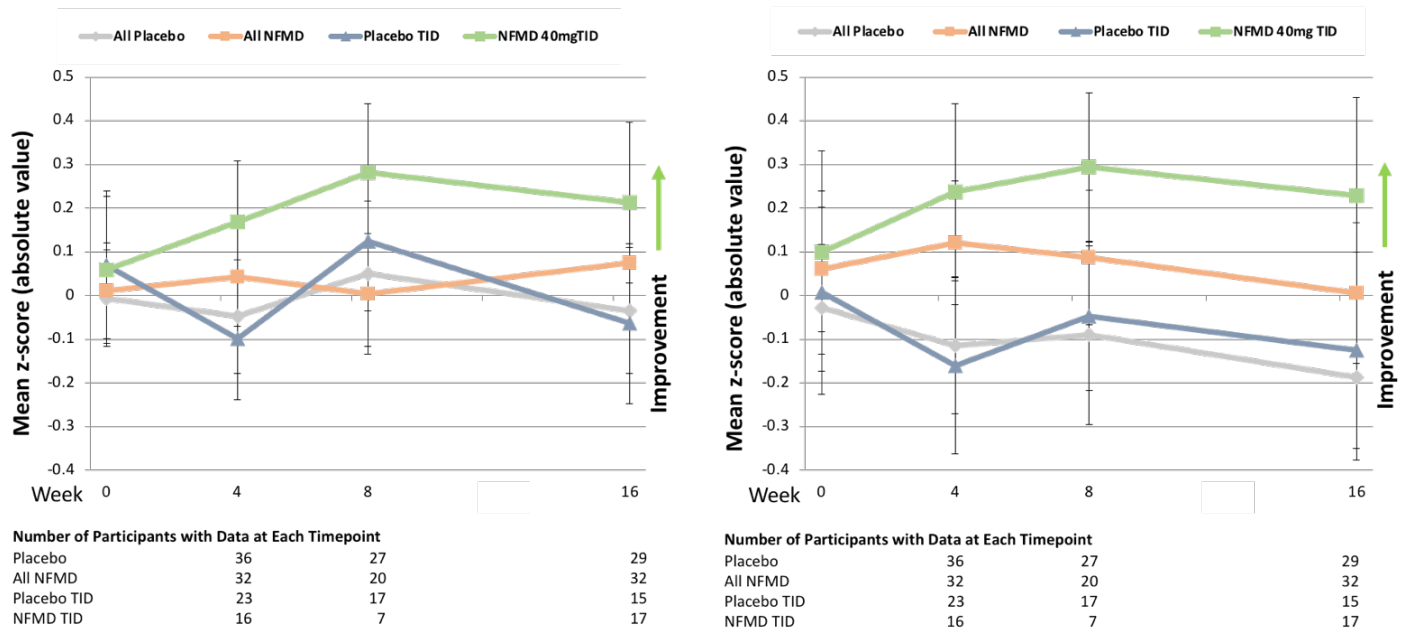

**Legend.**

a. Cognition, as assessed by a Neuropsychological Test Battery (NTB) composed of six tests that individually assess attention, executive function or visuospatial function. Mean ( $\pm$  SEM) absolute value of the composite z-score that includes results of all six tests are shown. b. Attention, as assessed by an Attention composite z-score that includes results on the two tests within the NTB that evaluate information processing speed, Detection and Identification. Mean ( $\pm$  SEM) absolute value of the attention composite z-score is shown. Because of Covid-19 lockdowns, not all study visits could take place onsite, and for all but the CDR-SB the assessments could only occur onsite, the number of participants, therefore, varies during the course of the study; the number of participants with data at indicated study visit are shown by treatment group below each outcome measure.

Supplementary Figure 4. Descriptive analyses of CDR-SB and TUG Test Results

a. Clinical Dementia Rating Sum-of-Boxes (CDR-SB)

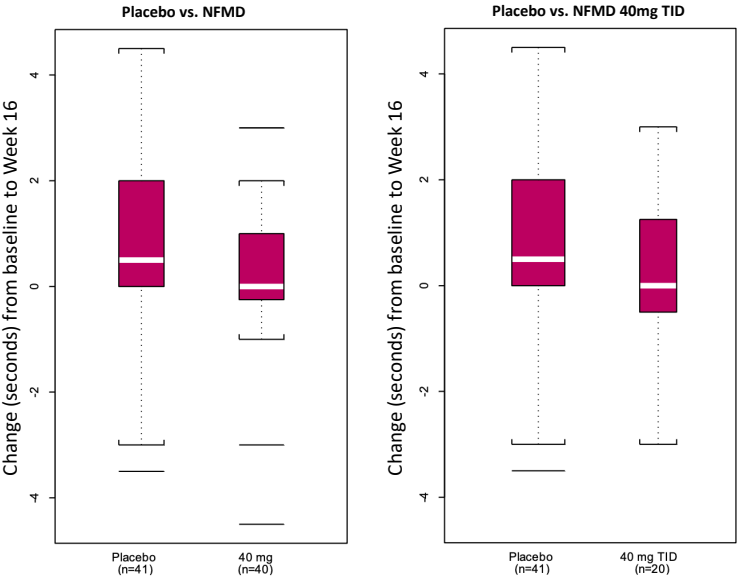

b. Timed Up and Go (TUG)

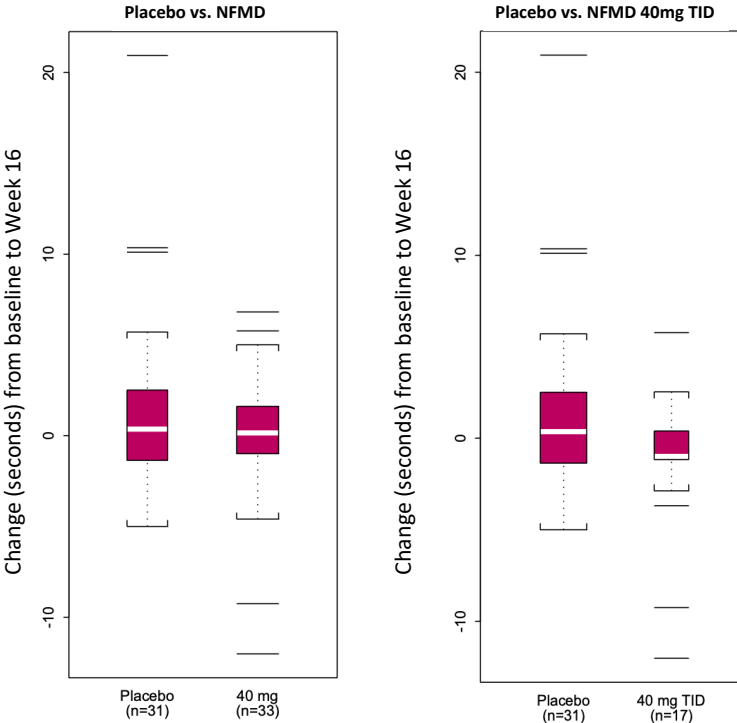

**Legend.** Change from baseline to week 16 [median, intra-quartile range in red, and range] is shown for each outcome measure. An increase in score reflects worsening.

## Supplementary Figure 5. Change from Baseline on Individual Domains of the CDR-SB

### a. Cognitive Domains

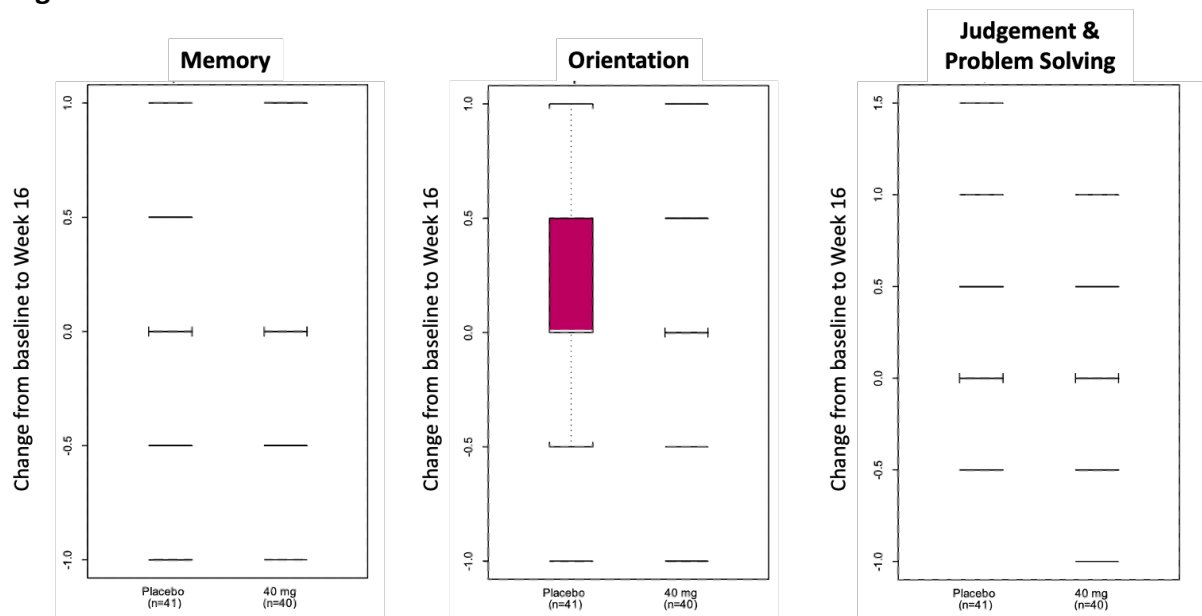

### b. Functional Domains

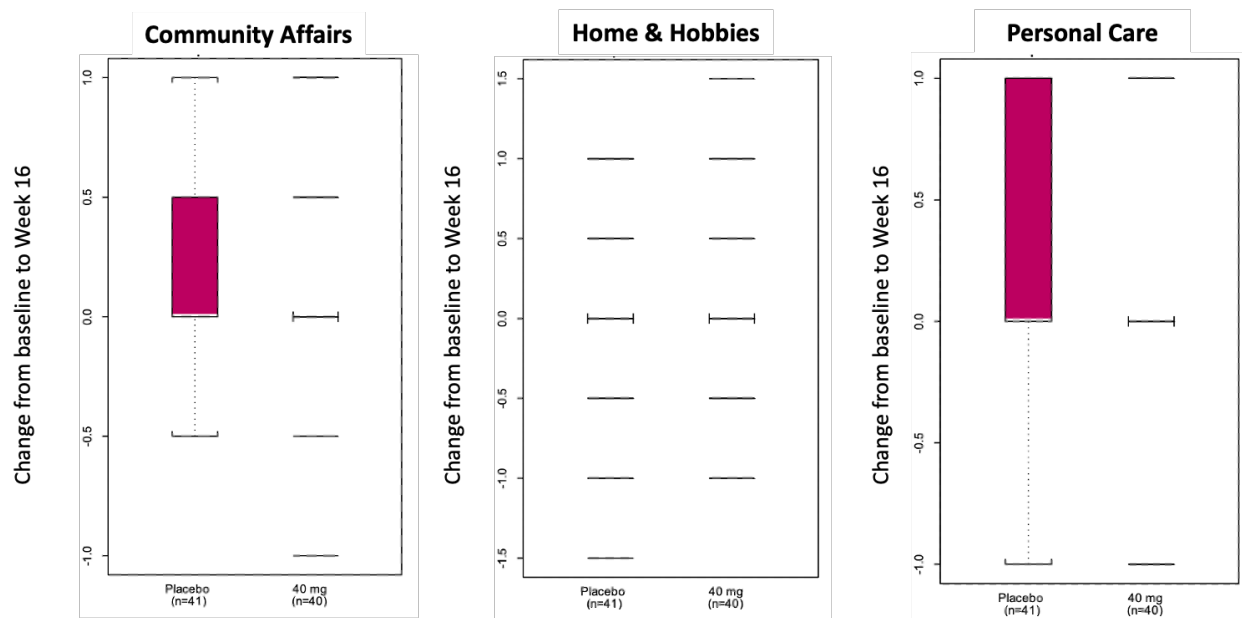

**Legend.** Change from baseline to week 16 [median, intra-quartile range in red, and range] is shown for each domain within the CDR-SB. An increase in score reflects worsening.

**Supplementary Figure 6. Improvement in change from baseline between neflamapimod treatment and placebo (MMRM analysis of Change from Baseline) by baseline plasma ptau181 status**

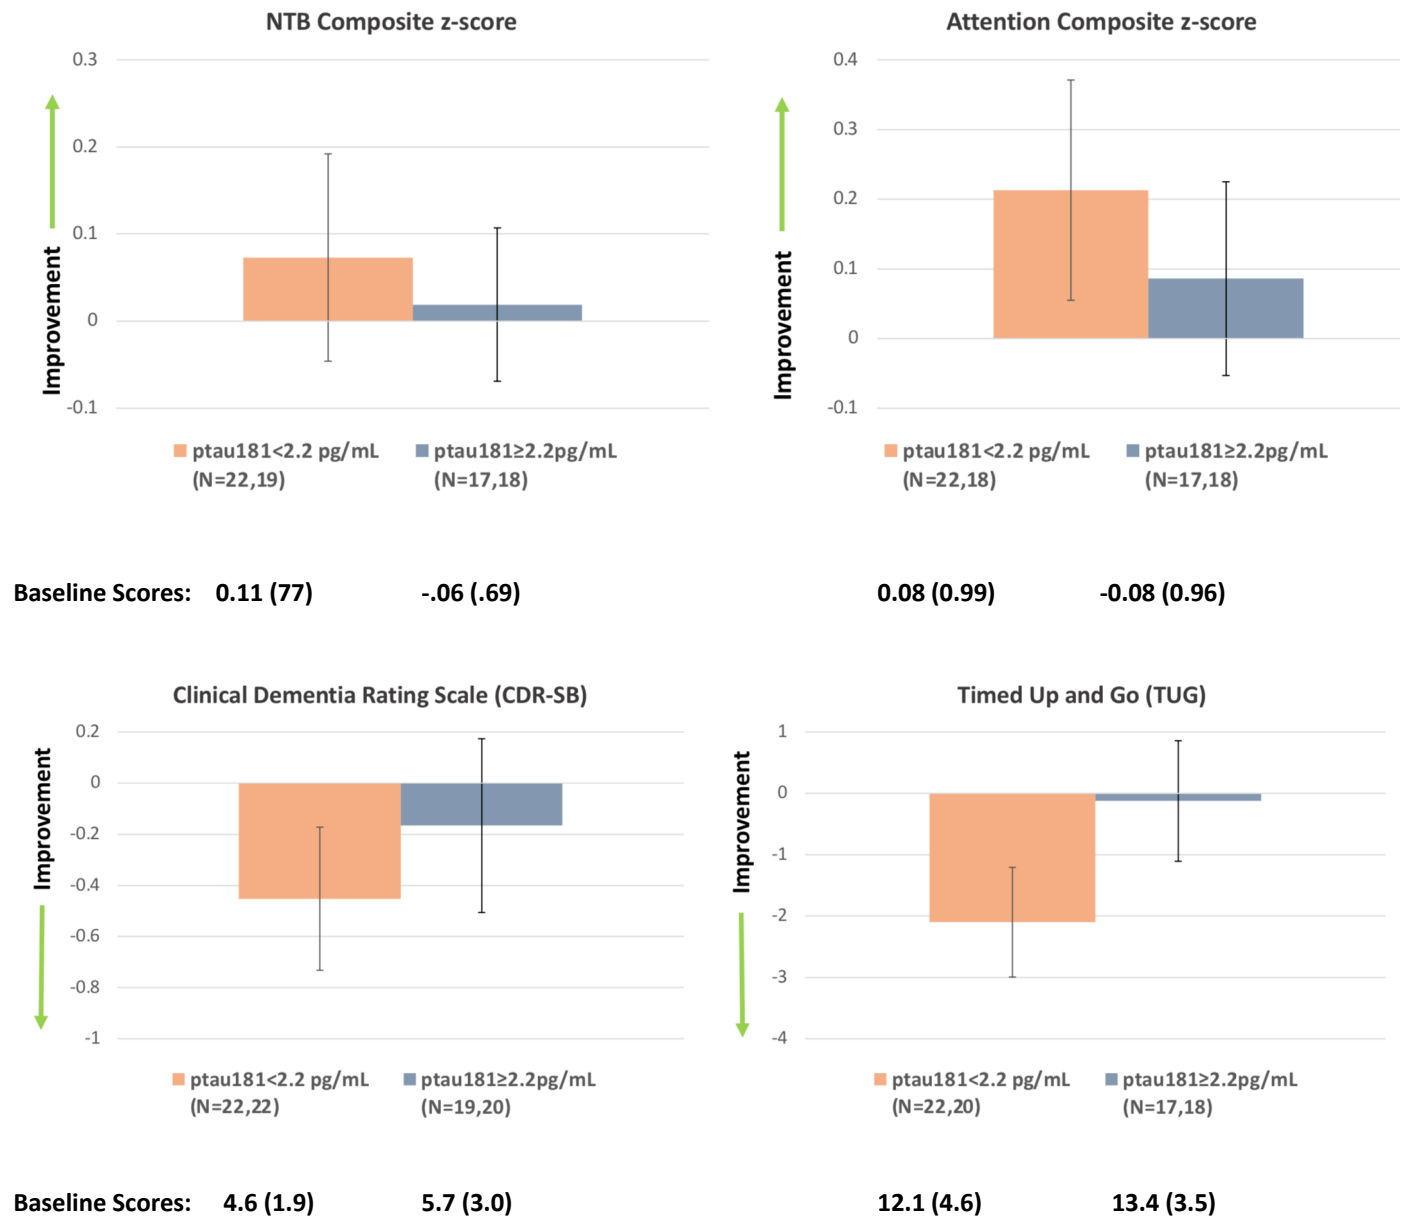

**Legend.** Mean (+/- SEM) drug-placebo difference from MMRM analysis with baseline as a covariate is shown, stratified by baseline plasma ptau18 status (< or ≥ 2.2 pg/mL). The baseline [mean (SD)]score for each outcome measure by stratum is also provided. Number of participants denoted as N=, with first number representing number of neflamapimod participants and the second number representing placebo participants

**Supplementary Table 1. Change from baseline MMSE scores on study by type of visit**

|             | <b>Treatment</b> | <b>Location</b> | <b>median</b> | <b>mean</b> | <b>N</b> | <b>SE</b> |
|-------------|------------------|-----------------|---------------|-------------|----------|-----------|
| <b>MMSE</b> | All Placebo      | On-site         | -0.50         | -0.56       | 60       | 0.311     |
|             |                  | Remote          | 0.00          | 0.53        | 15       | 0.595     |
|             | All NFMD         | On-site         | -0.50         | -0.74       | 55       | 0.329     |
|             |                  | Remote          | 1.50          | 0.68        | 11       | 0.532     |
|             | Placebo TID      | On-site         | -0.50         | -0.72       | 37       | 0.388     |
|             |                  | Remote          | 0.25          | 0.75        | 10       | 0.876     |
|             | NFMD TID         | On-site         | -0.50         | -0.52       | 26       | 0.437     |
|             |                  | Remote          | 1.00          | 1.25        | 6        | 0.359     |



**Supplementary Table 2. Serious Adverse Events (SAEs) Reported in the Study and Discontinuations due to Treatment Emergent Adverse Events (TEAEs)**

| <b>Treatment Group</b> | <b>Number of SAEs</b> | <b>Descriptions (All considered not related to study drug)</b>                                                                        |
|------------------------|-----------------------|---------------------------------------------------------------------------------------------------------------------------------------|
| Placebo BID            | 3                     | Hematochezia<br>Internal Bleeding<br>Intraparenchymal hemorrhage                                                                      |
| Placebo TID            | 1                     | Asthma exacerbation                                                                                                                   |
| Neflamapimod 40mg BID  | 3                     | New brain lesions, consistent with brain metastasis (unknown primary)<br>Brain Tumor Diagnosis 34 days after last dose<br>Head Injury |
| Neflamapimod 40mg TID  | 0                     | -                                                                                                                                     |

**Subjects Withdrawn due TEAE**

|                       | <b>TEAE</b>  | <b>Severity</b> | <b>Relationship to Study Drug</b> |
|-----------------------|--------------|-----------------|-----------------------------------|
| Neflamapimod 40mg BID | Brain lesion | Severe          | Not Related                       |
|                       | Somnolence   | Moderate        | Possibly Related                  |
|                       | Head injury  | Moderate        | Not Related                       |
| Placebo BID           | Hematochezia | Moderate        | Not Related                       |

**Supplementary Table 3 MMRM Analysis of Clinical Outcome Measures – Neflamapimod 40mg TID vs. Placebo**

|                                                       | <i>Number of Participants</i> |         | <i>Mean Baseline Values</i> |         | <i>Analysis of Change from Baseline</i> |                                                  |
|-------------------------------------------------------|-------------------------------|---------|-----------------------------|---------|-----------------------------------------|--------------------------------------------------|
|                                                       | NFMD 40mg TID                 | Placebo | NFMD 40mg TID               | Placebo | Difference On-Study (95% CI)            | Cohen's d Effect Size for Improvement - <i>d</i> |
| <i>NTB* Composite z-score</i>                         | 19                            | 37      | 0.06                        | 0.07    | 0.17 (0.00, 0.35)                       | 0.47                                             |
| <i>Attention Composite z-score</i>                    | 19                            | 36      | 0.1                         | 0.00    | 0.28 (0.04, 0.51)                       | 0.41                                             |
| <i>Clinical Dementia Rating Sum of Boxes (CDR-SB)</i> | 20                            | 42      | 4.7                         | 5.1     | -0.56 (-0.96,-0.16)                     | 0.31                                             |
| <i>Timed Up and Go (TUG)</i>                          | 20                            | 38      | 13.3                        | 13.5    | -1.4 (-2.6,-0.2)                        | 0.50                                             |

\*NTB: Neuropsychological Test Battery evaluating attention, executive function, and visual learning. Note: Difference (95% CI) from MMRM analysis. Improvement is reflected as increases in NTB and the Attention Composite; and as decreases in CDR-SB and TUG test. Positive *d* indicates improvement relative to placebo, and negative *d* indicates worsening from baseline.

**Supplementary Table 4 MMRM Analysis of Clinical Outcome Measures – Neflamapimod 40mg TID vs. Placebo TID**

|                                                       | <i>Number of Participants</i> |             | <i>Mean Baseline Values</i> |             | <i>Analysis of Change from Baseline</i> |                                                  |
|-------------------------------------------------------|-------------------------------|-------------|-----------------------------|-------------|-----------------------------------------|--------------------------------------------------|
|                                                       | NFMD 40mg TID                 | Placebo TID | NFMD 40mg TID               | Placebo TID | Difference On-Study (95% CI)            | Cohen's d Effect Size for Improvement - <i>d</i> |
| <i>NTB* Composite z-score</i>                         | 19                            | 22          | 0.06                        | 0.05        | 0.21 (0.00, 0.43)                       | 0.49                                             |
| <i>Attention Composite z-score</i>                    | 19                            | 23          | 0.09                        | -0.02       | 0.24 (-0.02, 0.51)                      | 0.33                                             |
| <i>Clinical Dementia Rating Sum of Boxes (CDR-SB)</i> | 20                            | 26          | 4.7                         | 4.4         | -0.63 (-1.06,-0.21)                     | 0.38                                             |
| <i>Timed Up and Go (TUG)</i>                          | 20                            | 23          | 13.3                        | 13.3        | -1.4 (-3.1,0.3)                         | 0.44                                             |

\*NTB: Neuropsychological Test Battery evaluating attention, executive function, and visual learning. Note: Difference (95% CI) from MMRM analysis. Improvement is reflected as increases in NTB and the Attention Composite; and as decreases in CDR-SB and TUG test. Positive *d* indicates improvement relative to placebo, and negative *d* indicates worsening from baseline.
